# Supplementary material
Source: Research Square preprint supplement (doi:10.21203/rs.3.rs-9029355/v1)
Supplement: Supplementary file 1 [file 37b9c24aa722a6194fcb3fb8.xlsx]

## Sheet: Mortality & survivorship
	D4												M3											d4												m3
	left						right						left				right							left						right						left				right								summary statistics
Collection number	WS0	WS1	WS2	WS3	WS4	WS5	WS0	WS1	WS2	WS3	WS4	WS5	WS5	WS6	WS7	WS8	WS5	WS6	WS7	WS8			Collection number	WS0	WS1	WS2	WS3	WS4	WS5	WS0	WS1	WS2	WS3	WS4	WS5	WS5	WS6	WS7	WS8	WS5	WS6	WS7	WS8
HAM4																							HAM4																									birth	WS0
GPIT/MA/17841														1				1			skull		XCIV-08968					1						1										skull+both mandibles d1-m2		HAM4	maxilla		4
GPIT/MA/18000														1				1			skull+mandible+skeleton		XCIV-03605				1																	d3-m1			mandible		2
GPIT/MA/10917																		1			P2-M3		XCIV-08574										1											d3-m1			total		4
GPIT/MA/16851			1																		D3-M1		XCIV-03476														1							p3-m3			juveniles		22
GPIT/MA/12466											1										D4		XCIV-03829, 03830														1							m1-m3			survivorship	100	90.9091
GPIT/MA/17034																		1			P2-M3		XCIV-04398																		1			p3-m3
GPIT/MA/17982															1						P4-M3		XCIV-03957																			1		p2-m3					WS0
GPIT/MA/16770																		1			M1-M3		XCIV-03962															1						p1-m3		HAM5	maxilla		0
GPIT/MA/16777																			1		M3		XCIV-04282										1											d3-d4			mandible		0
GPIT/MA/17210														1							M3		XCIV-08134					1																d2-d4			total		0
GPIT/MA/18038														1							M3		XCIV-06708										1											d3-m1			juveniles		6
GPIT/MA/17135																		1			M3		GPIT/MA/16825														1							p2-m3
GPIT/MA/17340																	1				M3		GPIT/MA/18000														1							skull+mandible p4-m3+skeleton
GPIT/MA/16790																	1				M3		GPIT/MA/17192																			1		p2-m2
GPIT/MA/16422																	1				M3		GPIT/MA/16746															1						p1-m3
GPIT/MA/16417																			1		M3		GPIT/MA/17792															1						p2-m3
XCIV-08970					1						1										skull		GPIT/MA/17103																				1	p2-m3
XCIV-03500					1						1										skull		GPIT/MA/17300																		1			p4-m3
XCIV-00550a														1							P2-M3		GPIT/MA/17600														1							m1-m3
XCIV-00550b																		1			P2-M3		GPIT/MA/16532															1						p3-m3
XCIV-3877										1											D4		GPIT/MA/16402																			1		m3
XCIV-10435							1														D4		GPIT/MA/17747																		1			m3
XCIV-2653									1												D4		GPIT/MA/17092																		1			m3
XCIV-6723									1												D3, D4		GPIT/MA/17864																			1		m3
XCIV-6724	1																				D4		GPIT/MA/17943				1																	d1-m1
XCIV-6726				1																	D4		GPIT/MA/16959											1										d3-m2
XCIV-7886			1																		D4		GPIT/MA/10937										1											d4-m1
XCIV-13122				1																	D4		GPIT/MA/16105			1																		d4-m1
XCIV-13184					1																D4		GPIT/MA/17532									1												d4
XCIV-6725		1																			D4		XCIV-06710			1																		d4
XCIV-15933											1										D4		XCIV-10447		1																			d4
XCIV-15934										1											D4		XCIV-10445	1																				d4
XCIV-15938												1									D4		XCIV-03950			1																		d4
XCIV-15940								1													D4		XCIV-10400							1														d4
XCIV-15950							1														D4		XCIV-10333			1																		d4
XCIV-15953	1																				D4		XCIV-10374					1																d4
XCIV-16064				1																	D4-M1		XCIV-15960							1														d4
XCIV-17376							1														D4		XCIV-15994									1												d4
XCIV-17378						1															D4		XCIV-15996										1											d4
XCIV-17381							1														D4		XCIV-15997					1																d4
XCIV-18870														1							skull		XCIV-15999												1									d4
XCIV-3358														1							M1-M3		XCIV-16000		1																			d4
XCIV-6730													1								M3		XCIV-17363				1																	d4
XCIV-6731													1								M3		XCIV-08068																			1		m3
XCIV-4419																		1			M3		XCIV-06720													1								m3
XCIV-4248																			1		M3		XCIV-06718																			1		m3
XCIV-3497															1						M3		XCIV-03480														1							m3
XCIV-1310														1							M3		XCIV-08784																		1			m3
XCIV-3775																		1			M3		XCIV-10004																		1			m3
XCIV-4093														1							M3		XCIV-13121															1						m3
XCIV-2262																		1			M3		XCIV-16006														1							m3
XCIV-0024													1								M3		XCIV-06719																			1		m3
XCIV-1553														1							M3		XCIV-02150														1							m3
XCIV-7864																		1			M3			1	2	4	3	4	0	2	0	2	5	2	1	1	8	5	0	0	6	7	1
XCIV-10454																		1			M3		MNI	2	2	4	5	4	1							1	8	7	1
XCIV-6732																			1		M3
XCIV-13674																		1			M3
XCIV-13472																		1			M3
XCIV-13211																			1		M3
XCIV-15942																			1		M3
XCIV-4638														1							P4-M3
XCIV-13402																			1		P4-M3
	2	1	2	3	3	1	4	1	2	2	4	1	3	11	2	0	3	14	7	0
MNI							4	1	2	3	4	1					3	14	7	0
	D4												M3											d4												m3
	left						right						left				right							left						right						left				right
Collection number	WS0	WS1	WS2	WS3	WS4	WS5	WS0	WS1	WS2	WS3	WS4	WS5	WS5	WS6	WS7	WS8	WS5	WS6	WS7	WS8			Collection number	WS0	WS1	WS2	WS3	WS4	WS5	WS0	WS1	WS2	WS3	WS4	WS5	WS5	WS6	WS7	WS8	WS5	WS6	WS7	WS8
HAM5																							HAM5
GPIT/MA/09582				1																	D3-M1		XCV-00423																			1		p4-m3
GPIT/MA/13663									1												D4		XCV-00428															1						p4-m3
GPIT/MA/10229														1							M3		GPIT/MA/09511														1							m1-m3
GPIT/MA/10235													1								M3		GPIT/MA/09516											1										d2-m1
GPIT/MA/10231															1						M3		GPIT/MA/09515												1					1				?d4-m3
GPIT/MA/10234													1								M3		GPIT/MA/10243																		1			m3
GPIT/MA/10230														1							M3		GPIT/MA/13574																			1		m3
GPIT/MA/09579													1								M3		GPIT/MA/10244														1							m3
GPIT/MA/09576														1							M2+M3			0	0	0	0	0	0	0	0	0	0	1	1	0	2	1	0	1	1	2	0
XCV-0357														1				1			skull		MNI							0	0	0	0	1	1	1	2	2	1
XCV-0474															1				1		skull
	0	0	0	1	0	0	0	0	1	0	0	0	3	4	2	0	0	1	1	0
MNI	0	0	1	1	0	0							3	4	2	0
[truncated: 9 more columns]

## Sheet: BMm1-3-m2
			body mass according mandibles							combined (m1-3 and m2) body mass for HAM4+HAM5
collection number	tooth positions	sex	m1-3 length	m2 lenght	body mass (kg)		combined		BM range (kg)	26-27	27-28	28-29	29-30	30-31	31-32
			(mm)	(mm)	m1-m3	m2	body mass		number of individuals	1	2	4	1	4	3
HAM5
GPIT/MA/09511	m1-m3	?	41.85	11.7	30.1942	22.1583	26.1762
GPIT/MA/09515	d4-m3	?	43.2	12.8	33.5847	29.9061	31.7454
XCV-0423	p3-m3	?	42.55	12.2	31.9206	25.479	28.6998
HAM4
XCIV-03476	p3-m3	?	42.17	12.05	30.9751	24.4486	27.7118
XCIV-03829, 03830	m1-m3	?	43.6	12.41	34.6385	26.9722	30.8053
XCIV-04398	p3-m3	?	43.87	12.25	35.3627	25.8292	30.5959
XCIV-03957	p2-m3	?	42.37	12.4	31.4702	26.8997	29.185
XCIV-08968	skull+mandibles d1-m2	female		12.9		30.6929
GPIT/MA/17192	p2-m3	?	43.6	12.6	34.6385	28.375	31.5068
GPIT/MA/16746	p1-m3	?	43.06	12.48	33.2213	27.4832	30.3523
GPIT/MA/17792	p2-m3	?	42.08	12.08	30.754	24.6523	27.7032
GPIT/MA/17300	p4-m3	?	41.62	12.37	29.6415	26.6832	28.1624
GPIT/MA/17600	m1-m3	?	42.41	12.26	31.5699	25.8996	28.7348
GPIT/MA/16532	p3-m3	?	41.4	12.54	29.1196	27.9267	28.5231
GPIT/MA/18000	skull+mandible	female	42.8	12.8	32.5536	29.9061	31.2299
GPIT/MA/16825	p2-m3	?	42.18	12.81	30.9997	29.9841	30.4919
					29,1-35,4	22,2-30,7	26,2-31,7	range
					32.0429	27.081	29.4416	mean
